# Supplementary material for: Hyaluronic acid-based extracellular matrix triggers spontaneous M2-like polarity of monocyte/macrophage
Source: Royal Society of Chemistry journal article supplement (doi:10.1039/c9bm00155g), 2019-01-01
Supplement: c9bm00155g1.pdf [file c9bm00155g1.pdf]

## Supporting information

### Hyaluronic acid-based extracellular matrix triggers spontaneous M2-like polarity of monocyte/macrophage

Hyebin Kim<sup>1</sup>, Junghwa Cha<sup>1,2</sup>, Minjeong Jang<sup>1</sup>, Pilnam Kim<sup>1,2\*</sup>

#### Supplementary method

##### Live dead staining

Culture medium was removed from cell and washed DPBS. LIVE/DEAD™ Viability/Cytotoxicity Kit (Invitrogen™) was treated to cell. for 15 min at 37 °C. Then, Fresh culture medium was added to cell and image the sample by microscope.

|        |                         |                          |
|--------|-------------------------|--------------------------|
| hHAS1  | GGTGGGGACGTGCGGATC      | ATGCAGGATACACAGTGGAAGTAG |
| hHAS2  | GTGGATTATGTACAGGTTTGTGA | TCCAACCATGGGATCTTCTT     |
| hHYAL1 | CATCAAGGAGTATATGGACAC T | CAGGGTTAAGGAGGAGGA       |
| hHYAL2 | GATTACCTGACACGGCTG      | GAAACTGTTGGTGCTGAGA      |
| hHYAL3 | TTTCCCTGCTGCCACTT       | CTTGGGAGGGTTGACTGTAA     |

**Supplementary table 1 Primer sequences used in qRT-PCR**

## Cell viability of THP-1 within 3D matrix

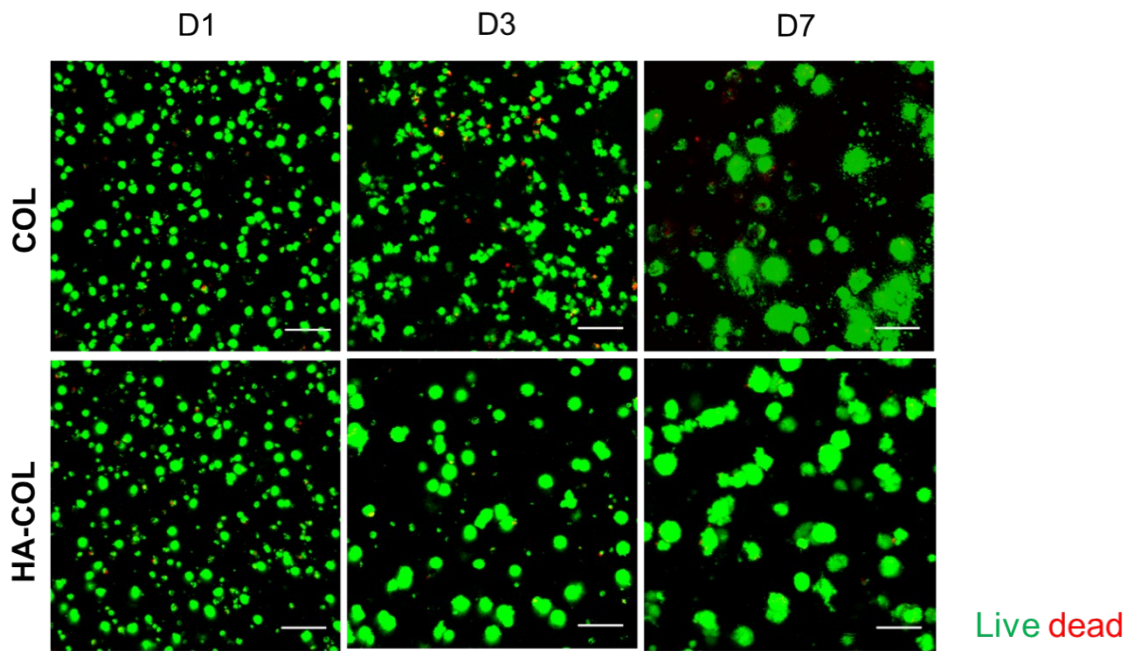

**Supplementary figure 1 Images of live/dead staining of THP-1 cells in the 3D matrix**

Green indicates live cells and Red indicates dead cells (scale bar : 100µm)

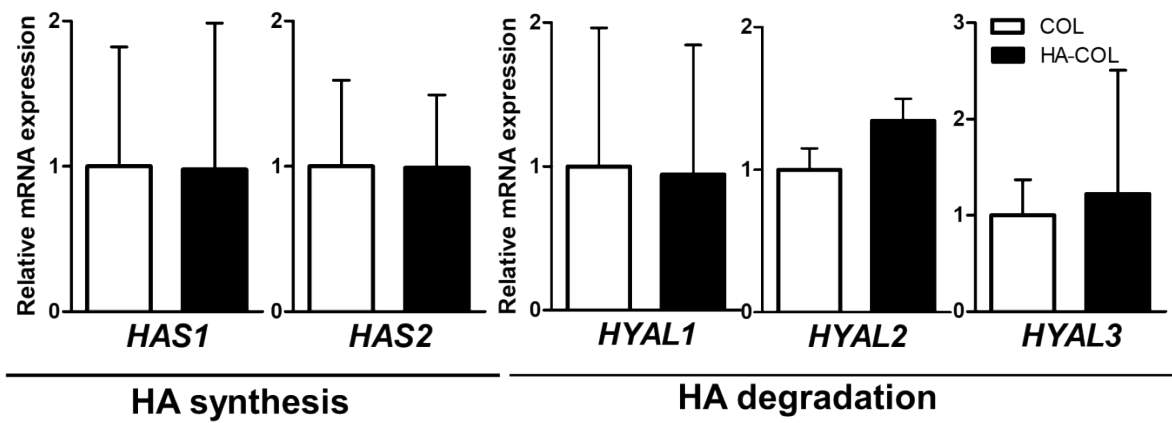

**Supplementary figure 2 Gene expression of HA metabolic gene**

Relative gene expression levels of HA synthesis (*HAS1*, *HAS2*) and HA degradation (*HYAL1*, *HYAL2*, *HYAL3*) (n=4; significant difference is determined by Student's t-test, no sign for no significant difference)

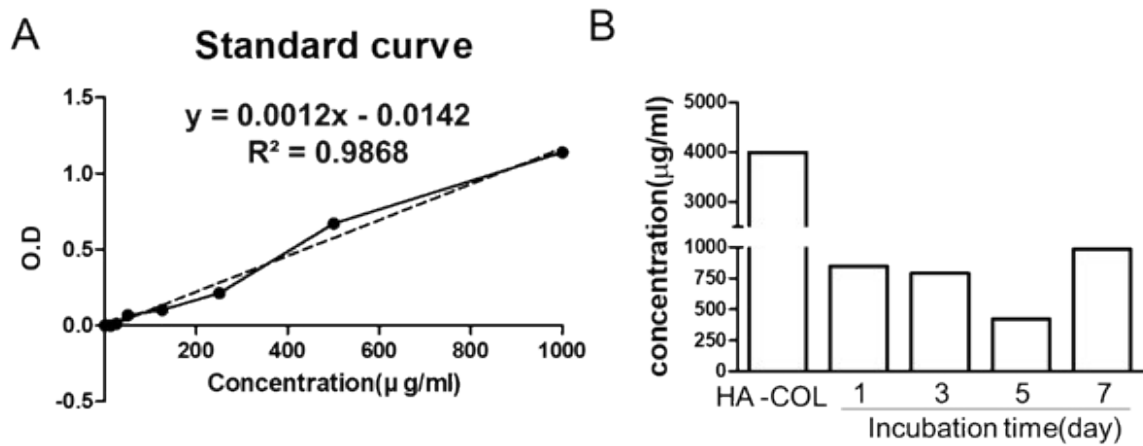

**Supplementary figure 3 HA releasing assay**

(A) Standard curve for HA releasing assay with HA solution. (B) Concentration of HA concentration from cell culture medium every 2 day. The concentration of HA is no significant difference among samples according to time. (n=3; significant differences were determined by Student's *t*-test, no sign for no significant difference)

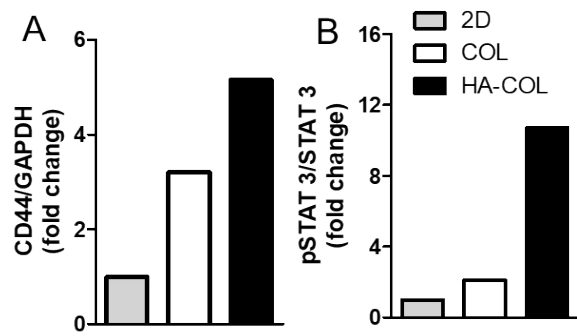

**Supplementary figure 4 Quantification of western blot analysis.** Densitometry was performed by Image J to quantify the expression of representative protein. (A), (B) The expression of CD44 and phosphorylated STAT3 (pSTAT3) was normalized to expression of GAPDH and total expression of STAT3 respectively.

## Morphology of differentiated THP-1 cells in 2D

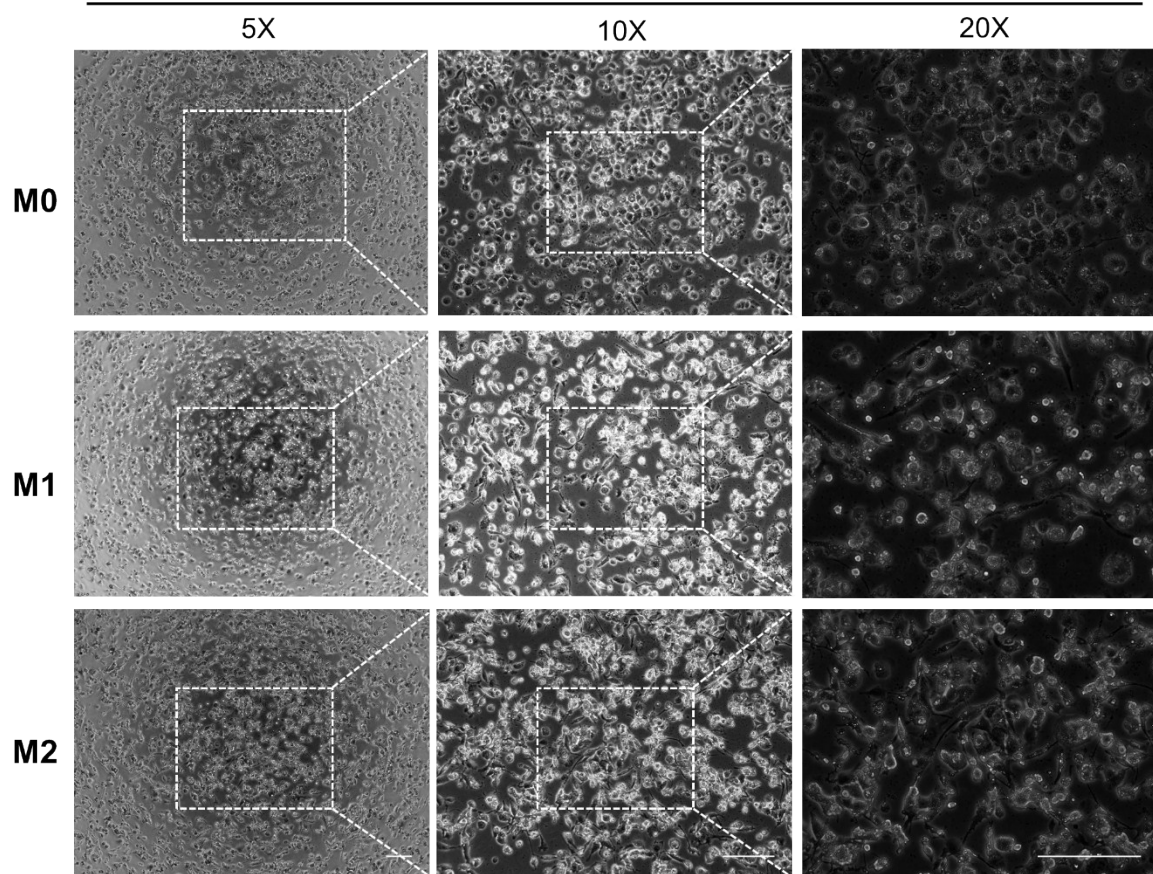

**Supplementary figure 5 Morphology of differentiated THP-1 cells in 2D**

Phase images of differentiated THP-1 cells (M0, M1, M2) after 5 day cultivation (Scale bar : 200 $\mu$ m)

Cell viability of differentiated THP-1 cells in 3D

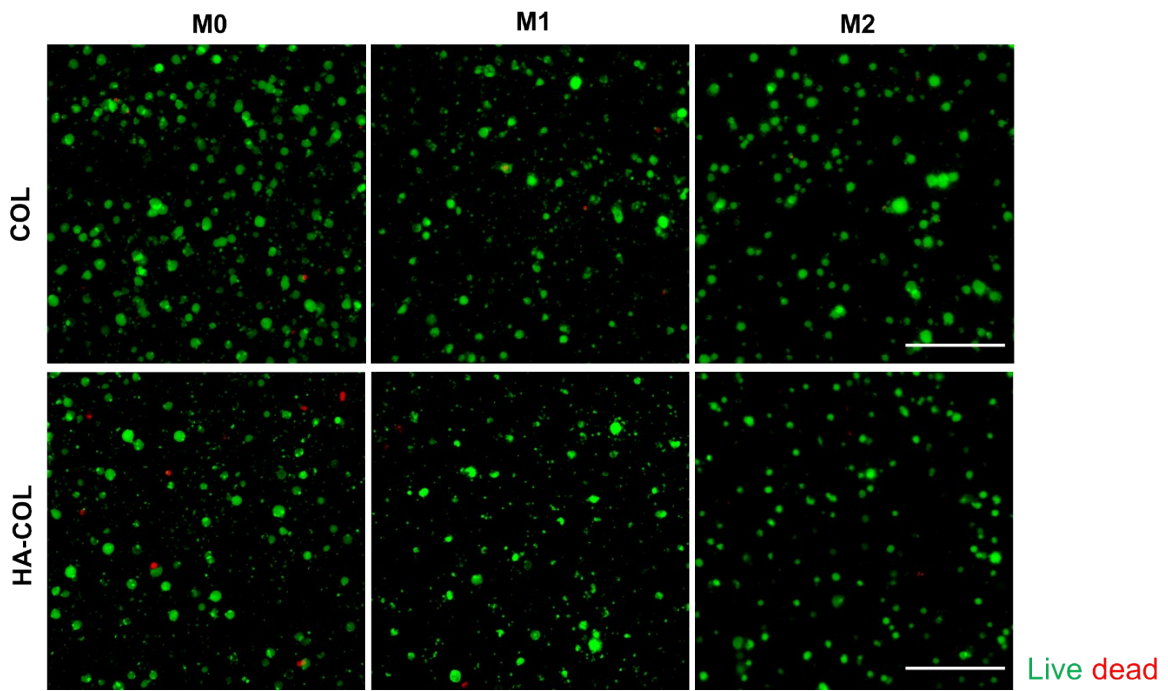

Supplementary figure 6 Images of live/dead staining of differentiated THP-1 cells within 3D matrix

Green indicates live cells and Red indicates dead cells (Scale bar : 200 $\mu$ m)

**Supplementary video**

**Supplementary video 1 Live imaging of THP-1 cells within COL**

**Supplementary video 2 Live imaging of THP-1 cells within HA-COL**
